# Supplementary material for: Novel aromatic proton-exchange polyelectrolytes via polyacylation of pre-sulfonated monomers
Source: Royal Society of Chemistry journal article supplement (doi:10.1039/c2jm31660a), 2012-01-01
Supplement: c2jm31660a.pdf [file c2jm31660a.pdf]

## Supporting Information

### Novel Aromatic Polyelectrolytes via Polyacylation of Pre-sulfonated Monomer

Zhenghui Zhang, Liang Wu, Tongwen Xu\*

School of Chemistry and Material Science, University of Science and Technology of China,  
Hefei, Anhui, 230026, P. R. China

Fax: (+86) 0551-3601592, E-mail: [twxu@ustc.edu.cn](mailto:twxu@ustc.edu.cn)

#### 1. Spectrometric characterization

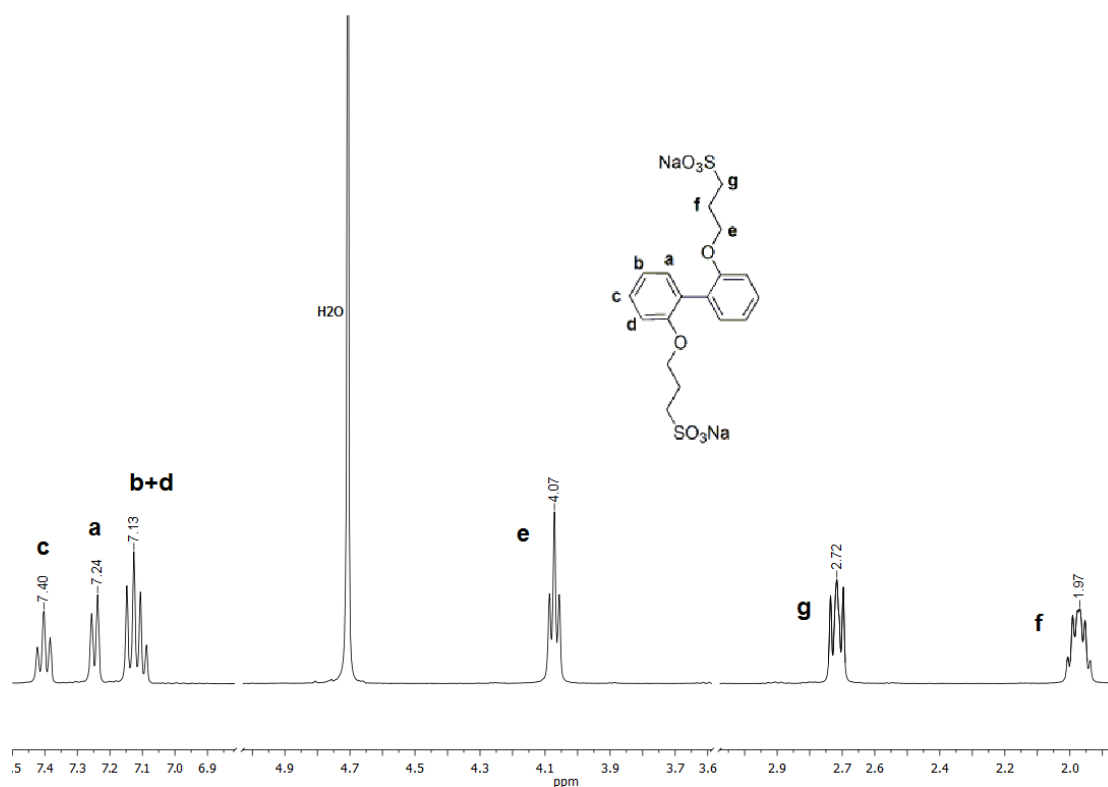

Figure S1. <sup>1</sup>H NMR spectrum of monomer SBP.

**Table S1.** A brief summary of monomers for polyacylation in acidic media reported in the literature.

| Diacid monomers                                                                                                                                         | Diarene monomers                                                                  | Acid-arene monomers                                                               | Reaction media                     | References |
|---------------------------------------------------------------------------------------------------------------------------------------------------------|-----------------------------------------------------------------------------------|-----------------------------------------------------------------------------------|------------------------------------|------------|
| -                                                                                                                                                       | -                                                                                 | 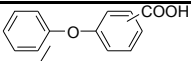 | P <sub>2</sub> O <sub>5</sub> /PPA | [1a]       |
| <br>HOOC-(C <sub>6</sub> H <sub>4</sub> ) <sub>2</sub> -COOH<br>1 or 2 |  |  | PPMA                               | [1b]       |
| <br>HOOC-(CH <sub>2</sub> ) <sub>4</sub> -COOH<br>4, 8 or 12           |  | -                                                                                 | PPMA                               | [1c]       |
| <br>HOOC-C <sub>6</sub> H <sub>3</sub> -COOH                           |  | -                                                                                 | PPMA,<br>TFSA                      | [1d]       |
| <br>HOOC-C <sub>6</sub> H <sub>3</sub> -COOH                           |  | -                                                                                 | PPMA,<br>TFSA                      | [1e]       |
| <br>HOOC-C <sub>6</sub> H <sub>3</sub> -COOH                           |  |  | TFSA                               | [1f]       |
| <br>HOOC-(C <sub>6</sub> H <sub>4</sub> ) <sub>2</sub> -COOH<br>2      |  |  |                                    |            |
| <br>HOOC-(C <sub>6</sub> H <sub>4</sub> ) <sub>2</sub> -COOH<br>2      |  |  |                                    |            |

## 2. Preliminary single fuel cell performance

The MEA was prepared following the procedure reported in the literature.<sup>[2]</sup> The loading of Pt (20% Pt/C, HeSen Electric, China) was 0.40 mg cm<sup>-2</sup> on both the anode and cathode electrode. The performance of the MEA with the active area of 12.25 cm<sup>2</sup> was measured using a 850e fuel cell test station (Scribner Associates, USA). The input flow rates of the anode H<sub>2</sub> and cathode O<sub>2</sub> were fixed at 200 cm<sup>3</sup>/min and 400 cm<sup>3</sup>/min, respectively. The cell temperature was controlled at 60 °C, and the humidification temperatures of the anode and cathode were controlled to achieve 100% relative humidity. Prior to recording the polarization curve, the MEA was activated by operating the test cell at open circuit voltage (OCV) for 1 h, followed by a potentiostatic discharge at 0.1 V and 0.5 V for 30 min respectively. Then, the polarization curve was recorded by linear sweeping of the potential from OCV to 0.35 V at a rate of 0.01 V/s.

As seen from Fig. S2, The peak power density of SCT-SAPs-1.0 was about 110 mW/cm<sup>2</sup>, higher than that of Nafion 115 (about 90 mW/cm<sup>2</sup>) under the same operation condition (H<sub>2</sub>/air, 60 °C, 100% RH), showing promising application in PEMFC. On the other hand, these outputs were much lower than reported ones (usually hundreds of mW/cm<sup>2</sup>), which we think may be mainly due to the use of domestic Pt/C catalyst instead of standard Johnson Matthey product and no hot-pressing of the MEA. Hence, there is a lot of work to optimize the whole system.

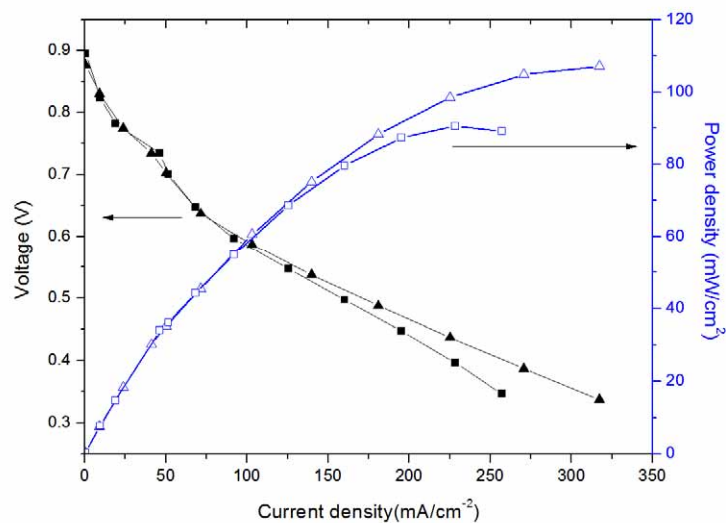

**Figure S2.** Single cell performance of current density-voltage curves (■ represents Nafion115, ▲ represents SCT-SAPs-1.0) and current density-power density curves (□ represents Nafion115, △ represents SCT-SAPs-1.0).

### References:

- [1] a) J.B. Baek, L.S. Tan, *Polymer* **2003**, *44*, 4135-4147; b) M. Ueda, M. Sato, *Macromolecules* **1987**, *20*, 2675; c) M. Ueda, T. Kano, T. Waragai, H. Sugita, *Makromol. Chem., Rapid Commun.* **1985**, *6*, 847; d) N. Yonezawa, S. Miyata, T. Nakamura, S. Mori, Y. Ueha, R. Katakai, *Macromolecules* **1993**, *26*, 5262; e) A. Okamoto, R. Mitsui, K. Maeyama, H. Saito, H. Oike, Y. Murakami, N. Yonezawa, *React. Funct. Polym.* **2007**, *67*, 1243; f) H. M. Colquhoun, D. F. Lewis, *Polymer* **1988**, *29*, 1902.
- [2] L. Wu, C. Huang, J. J. Woo, D. Wu, S. H. Yun, S. J. Seo, T. Xu, S. H. Moon, *J. Phys. Chem. B.* **2009**, *113*, 12265.
